# Supplementary material
Source: publisher site journal article supplement (https://www.dovepress.com/article/446895)

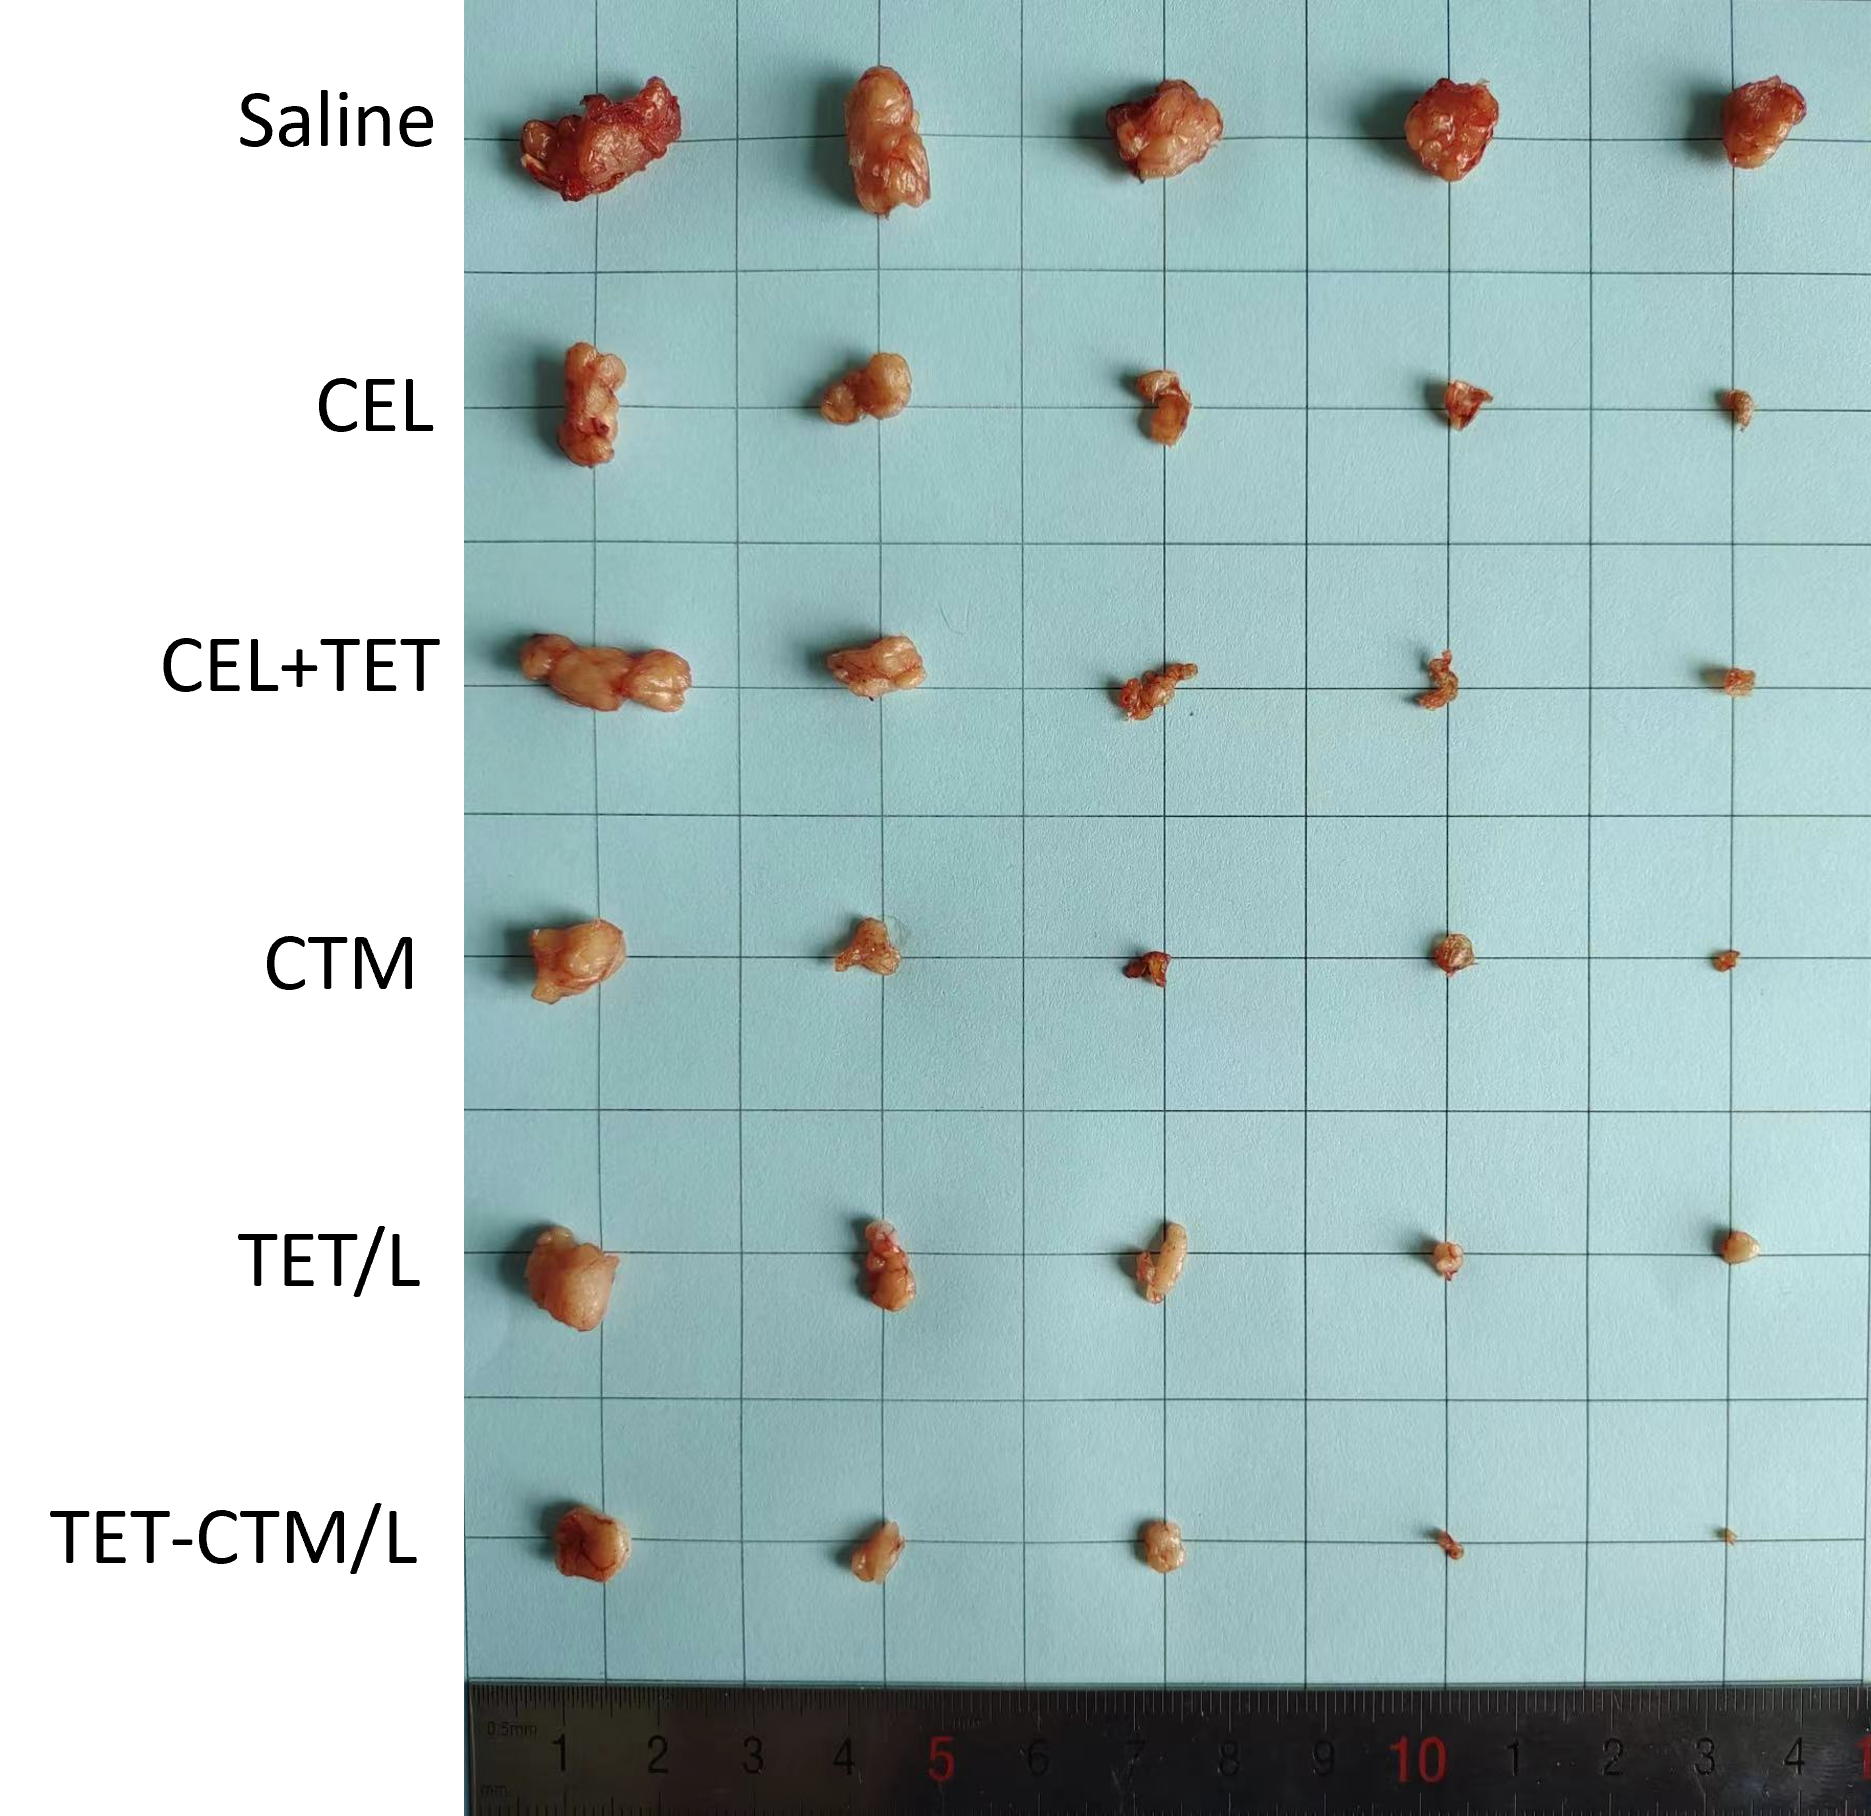


Figure S1. Photograph of tumors stripped from mice administrated intravenously with each formulation group（n = 5, ± *s*）


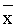

Supplement: Supplementary file 1 [file get_supplementary_file.php]
